# Supplementary material for: Mapping the Synthetic Dosage Lethality Network of CDK1/CDC28
Source: PubMed Central journal article supplement (PMC5473755; doi:10.1534/g3.117.042317), 2017-04-18
Supplement: 1753FigureS1.pdf [file 1753FigureS1.pdf]

**A**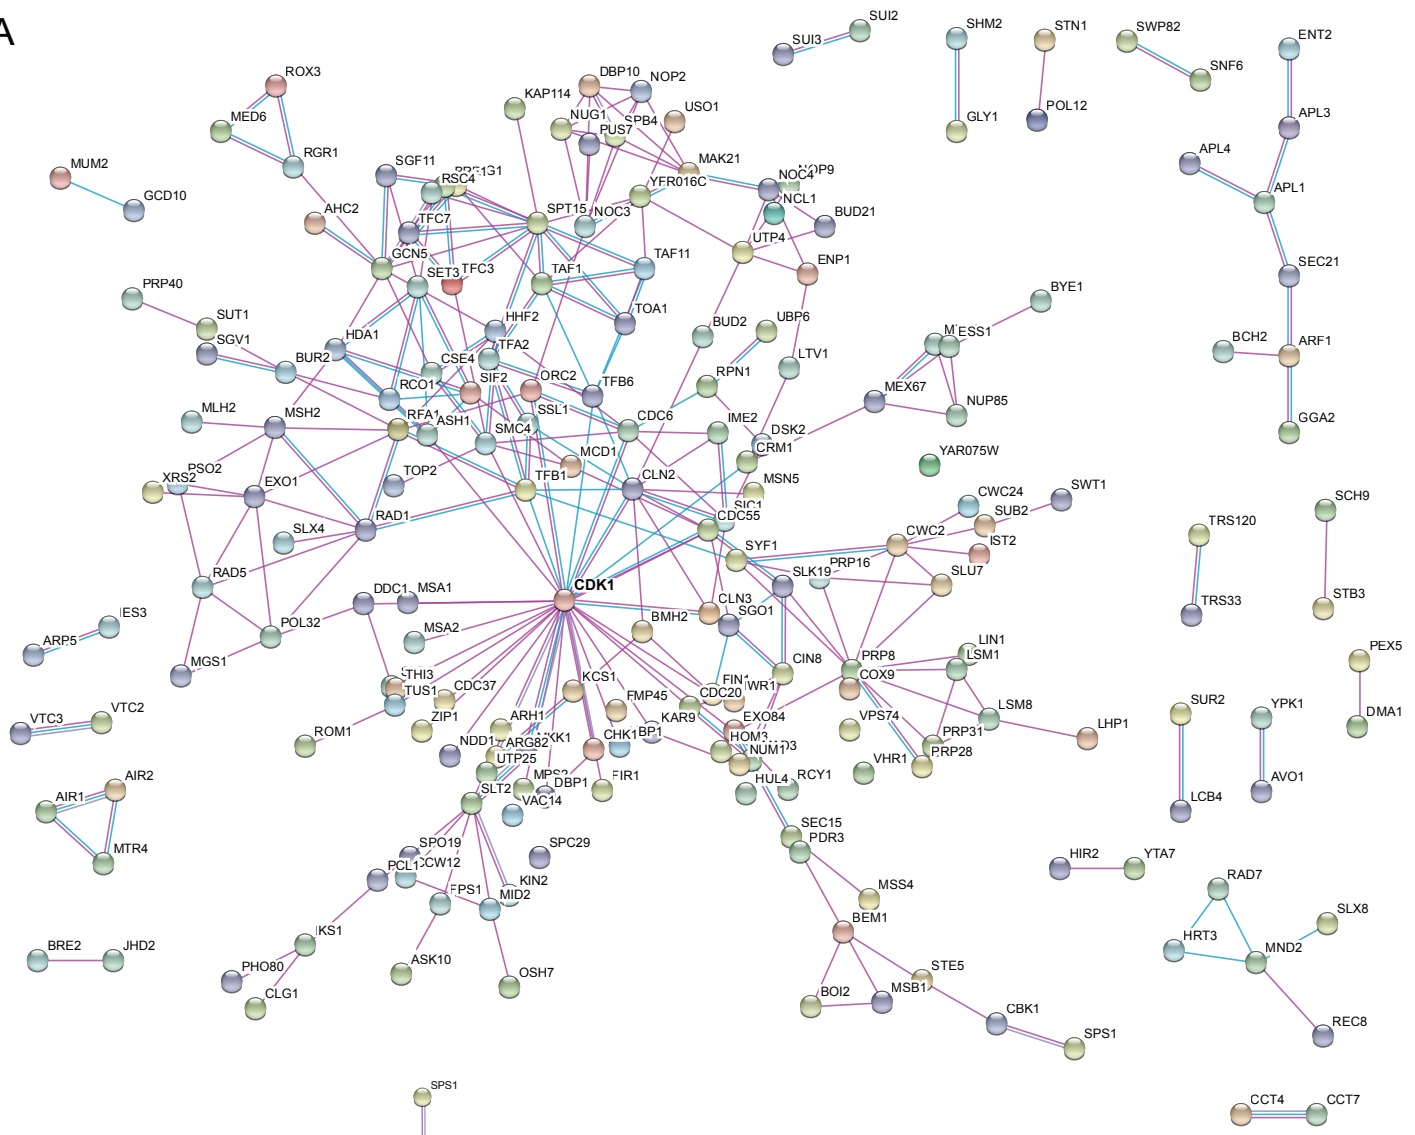**B**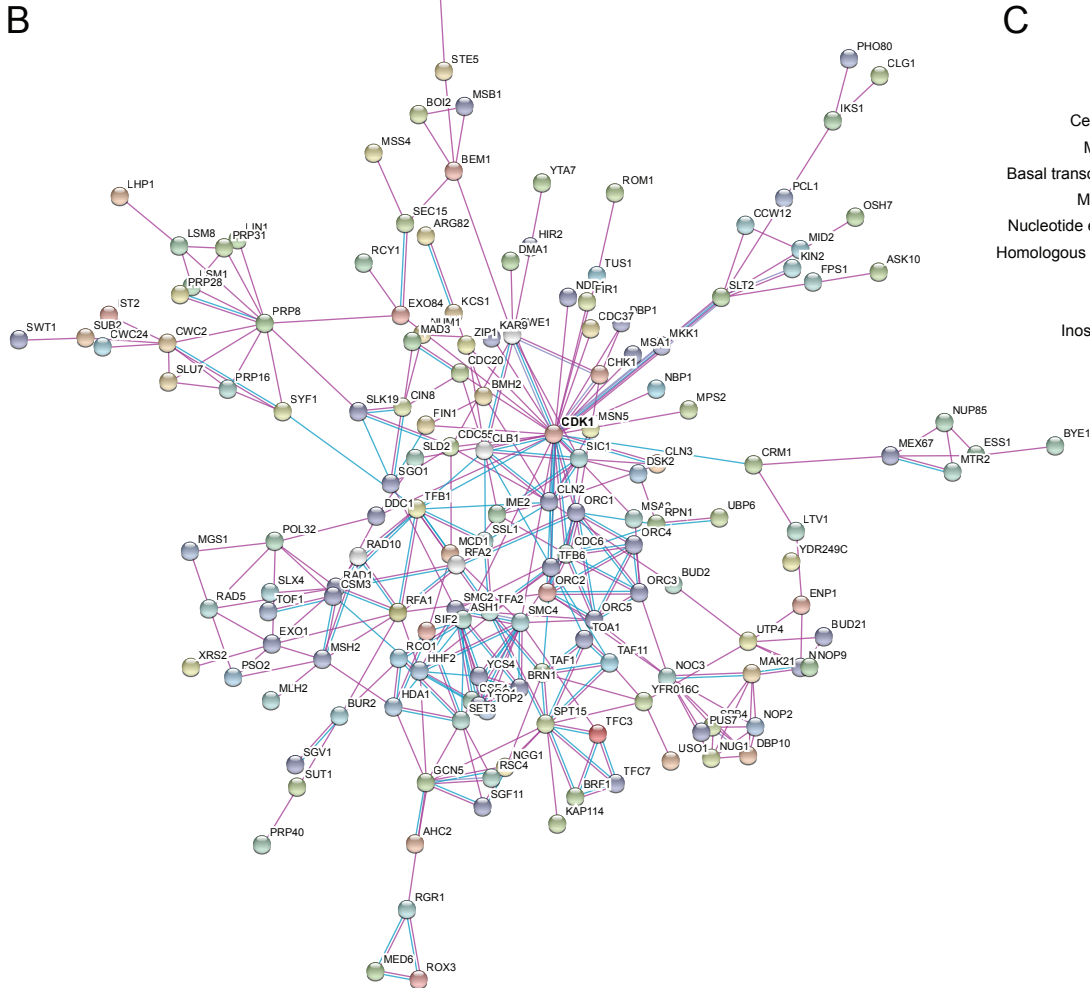**C**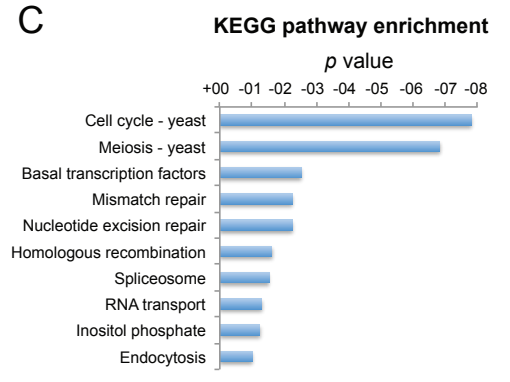

Figure S1. STRING analysis of the SDL network
