# Supplementary material for: Mapping the Synthetic Dosage Lethality Network of CDK1/CDC28
Source: PubMed Central journal article supplement (PMC5473755; doi:10.1534/g3.117.042317), 2017-04-18

Suppl. Figure S4

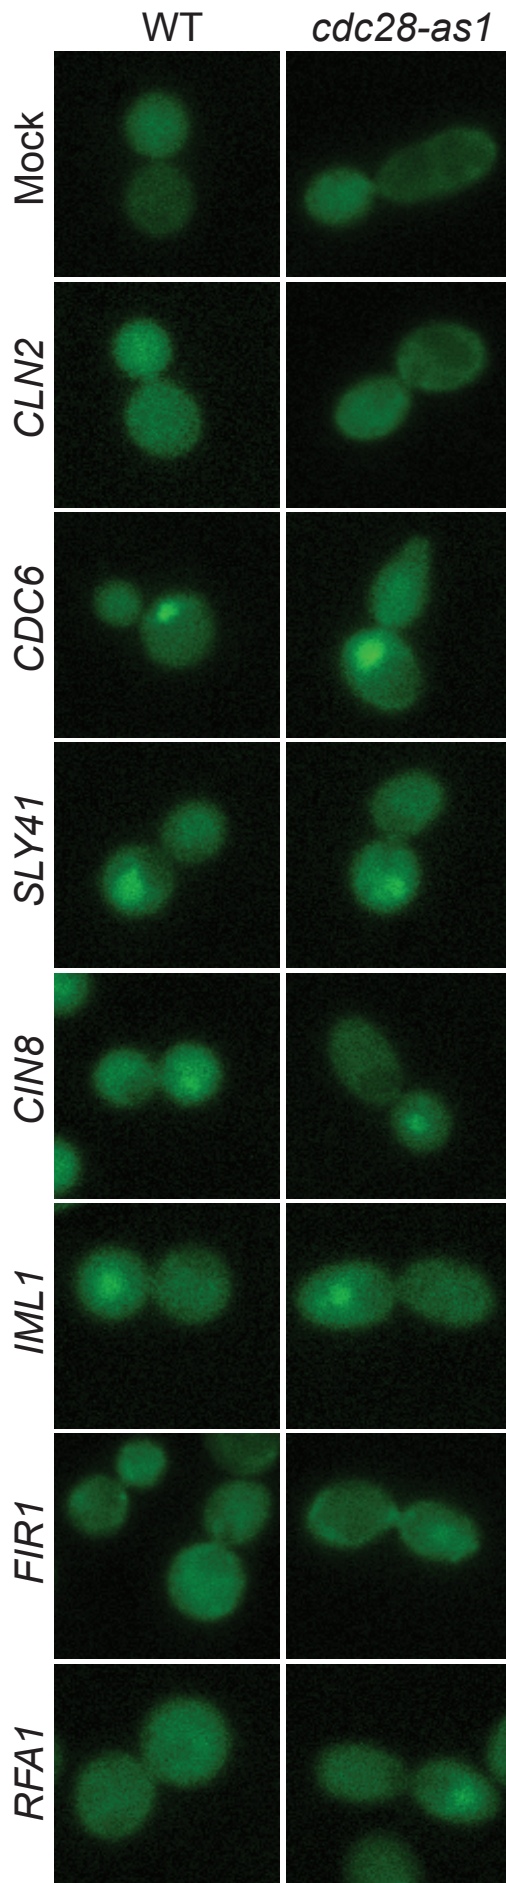

Supplement: 1753FigureS4.pdf [file 1753FigureS4.pdf]
